# Supplementary material for: Gas sensing properties of buckled bismuthene predicted by first-principles calculations
Source: Royal Society of Chemistry journal article supplement (doi:10.1039/c9cp01174a), 2019-01-01
Supplement: c9cp01174a11.pdf [file c9cp01174a11.pdf]

## Supplementary Information

### Gas sensing properties of buckled bismuthene predicted by first-principles calculation

Wenfeng Pan,<sup>†</sup> Ning Qi,<sup>\*,†</sup> Bin Zhao,<sup>‡</sup> Sheng Chang,<sup>†</sup> Shizhuo Ye,<sup>†</sup> and Zhiquan  
Chen<sup>\*,†</sup>

<sup>†</sup>*Hubei Nuclear Solid Physics Key Laboratory, Department of Physics, Wuhan University,  
Wuhan 430072, China*

<sup>‡</sup>*College of Science, Zhongyuan University of Technology, Zhengzhou 450007, China*

E-mail: ningqi@whu.edu.cn; chenzq@whu.edu.cn

#### Contents :

Fig. S1: The total (DOS) and partial (PDOS) electronic density of states for (a) pristine *b*-Bi and *b*-Bi adsorbed with (b) CO, (c) O<sub>2</sub>, (d) H<sub>2</sub>O, (e) NH<sub>3</sub>, (f) SO<sub>2</sub>, (g) NO, (h) NO<sub>2</sub> (with SOC).

Fig. S2: The *I* – *V* curves along the zigzag and armchair direction of pristine *b*-Bi and *b*-Bi with NH<sub>3</sub> adsorption.

Fig. S3: Diffusion energy barrier of (a) NH<sub>3</sub>, (b) O<sub>2</sub>, (c) NO and (d) NO<sub>2</sub> on *b*-Bi along armchair and zigzag directions.

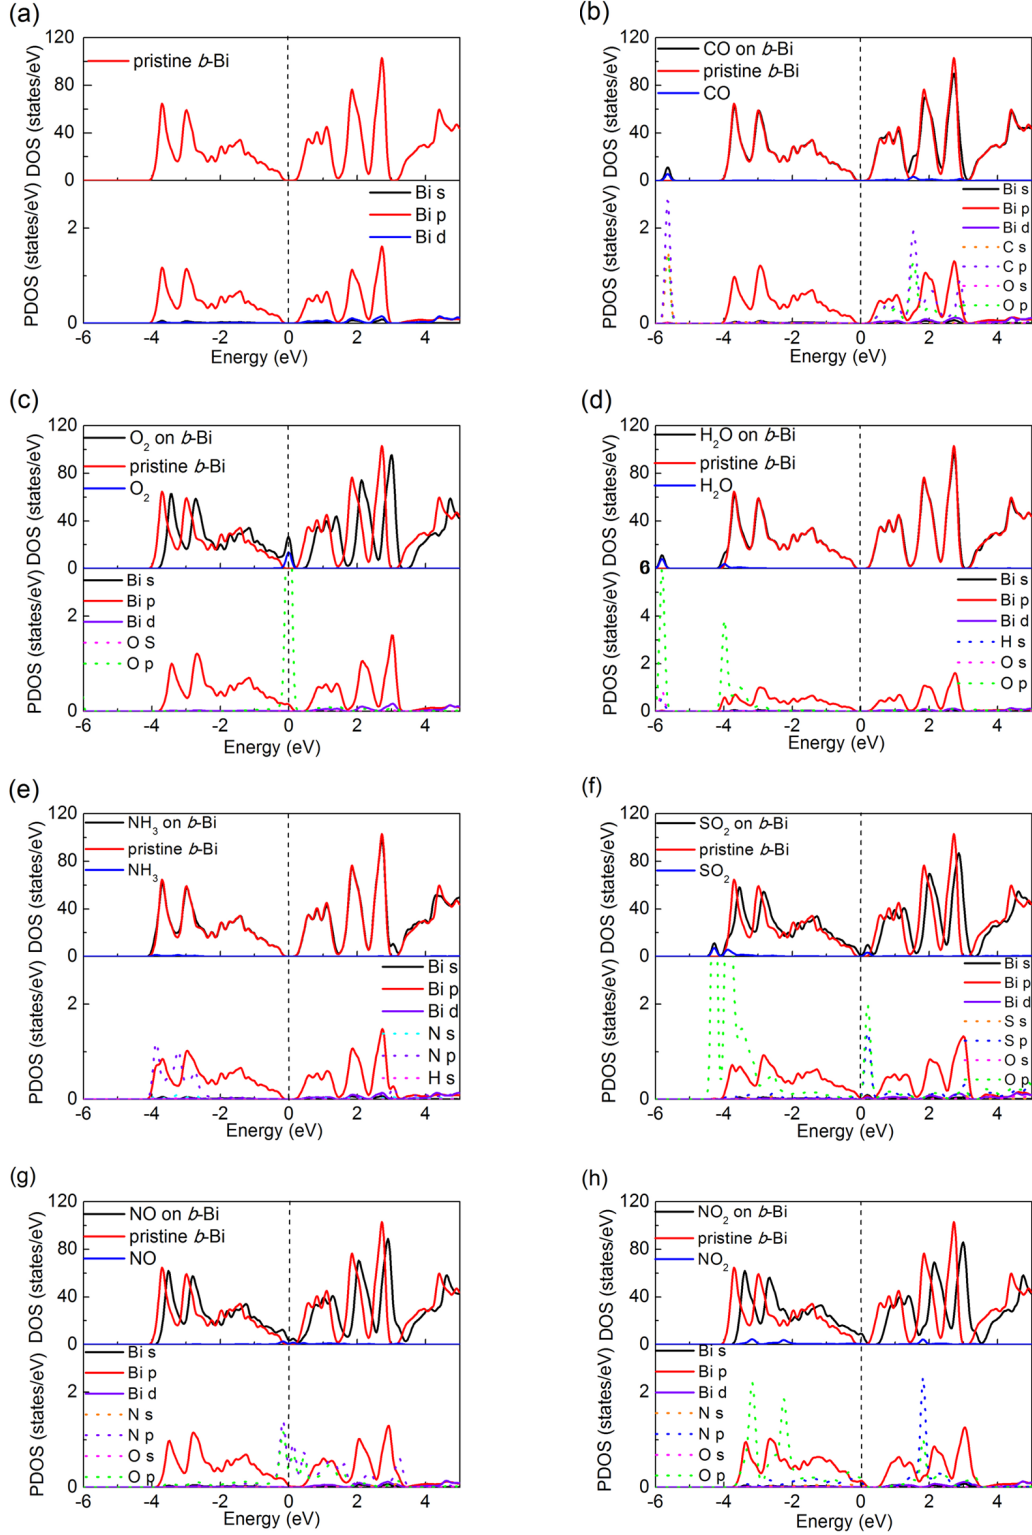

Fig. S1: The total (DOS) and partial (PDOS) electronic density of states for (a) pristine *b*-Bi and *b*-Bi adsorbed with (b) CO, (c) O<sub>2</sub>, (d) H<sub>2</sub>O, (e) NH<sub>3</sub>, (f) SO<sub>2</sub>, (g) NO, (h) NO<sub>2</sub> (with SOC). The Fermi level is set to zero and indicated by the black dashed line.

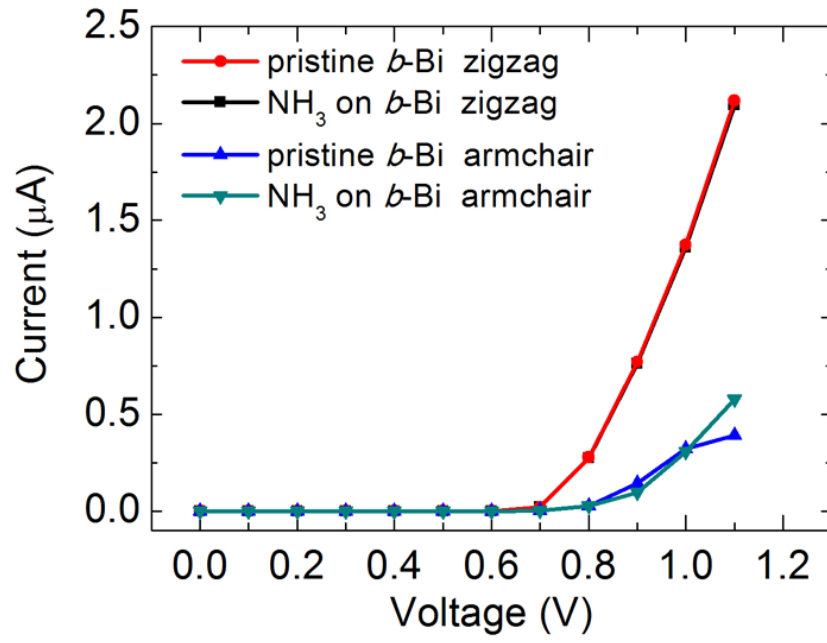

Fig. S2: The  $I - V$  curves along the zigzag and armchair direction of pristine *b*-Bi and *b*-Bi with NH<sub>3</sub> adsorption.

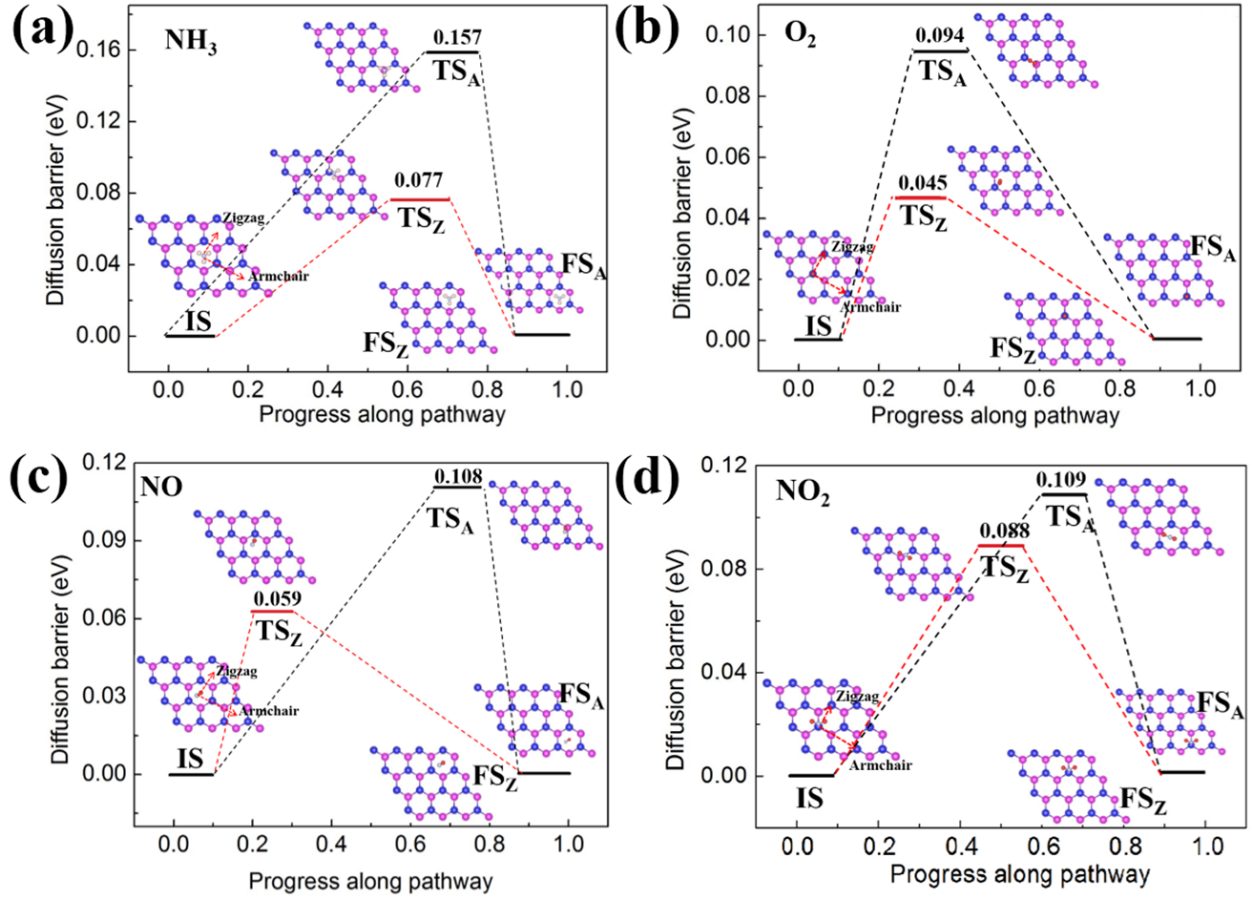

Fig. S3: Diffusion energy barrier of (a)  $\text{NH}_3$ , (b)  $\text{O}_2$ , (c)  $\text{NO}$  and (d)  $\text{NO}_2$  on  $b\text{-Bi}$  along armchair and zigzag directions. The configurations of initial state (IS), transition states along armchair direction ( $\text{TS}_A$ ) and along the zigzag direction ( $\text{TS}_Z$ ), final states along armchair direction ( $\text{FS}_A$ ) and along zigzag direction ( $\text{FS}_Z$ ) are included in the figure.
